# Supplementary material for: Reassessment of Viroid RNA Cytosine Methylation Status at the Single Nucleotide Level
Source: MDPI journal article supplement (doi:10.3390/v11040357), 2019-04-18

## SUPPLEMENTARY MATERIAL

### Reassessment of viroid RNA cytosine methylation status at the single nucleotide level

Francesco Di Serio<sup>1</sup>, Enza Maria Torchetti<sup>1</sup>, José-Antonio Daròs<sup>2,\*</sup>, Beatriz Navarro<sup>1,\*</sup>

**Figure S1 Bisulfite sequencing of - PSTVd RNAs.** Bisulfite cytosine conversion generated by the standard (St) and the improved (Im) protocols of a - PSTVd fragment amplified with the primer pair PSTVd\_met\_5F\_minus/PSTVd\_minus\_6R\_plus. The sequences targeted by the specific primers (salmon background) and the positions of cytosines in the reference variant PSTVd-Nb (green background) are indicated on the top. Converted (T, grey background) and unconverted (C, white background) cytosines are reported for each sequenced clone, the name of which is reported on the left, together with the percentage of unconverted cytosines.

**Figure S2 Bisulfite sequencing of + and - ASBVd RNAs.** Bisulfite cytosine conversion generated by the standard (St) and the improved (Im) protocols of + and - PSTVd fragments amplified with the primer pairs ASBVd\_met\_1F\_plus/ ASBVd \_met\_2R\_plus and ASBVd \_met\_3F\_minus/ ASBVd \_met\_4R\_minus (panel A and panel B, respectively). The sequences targeted by the specific primers (salmon background) and the positions of cytosines in the reference variant ASBVd (green background) are indicated on the top. Converted (T, grey background) and unconverted (C, white background) cytosines are reported for each sequenced clone, the name of which is reported on the left, together with the percentage of unconverted cytosines.

**Figure S3 Bisulfite sequencing of + HSVd *in vitro* transcript.** Bisulfite cytosine conversion generated by the standard (St) and the improved (Im) protocols of a + HSVd fragment amplified with the primer pair HSVd\_met\_1F\_plus/HSVd\_plus\_2R\_plus. The sequences targeted by the specific primers (salmon background) and the positions of cytosines in the reference variant HSVd (green background) are indicated on the top. Converted (T, grey background) and unconverted (C, white background) cytosines are reported for each sequenced clone, the name of which is reported on the left, together with the percentage of unconverted cytosines.

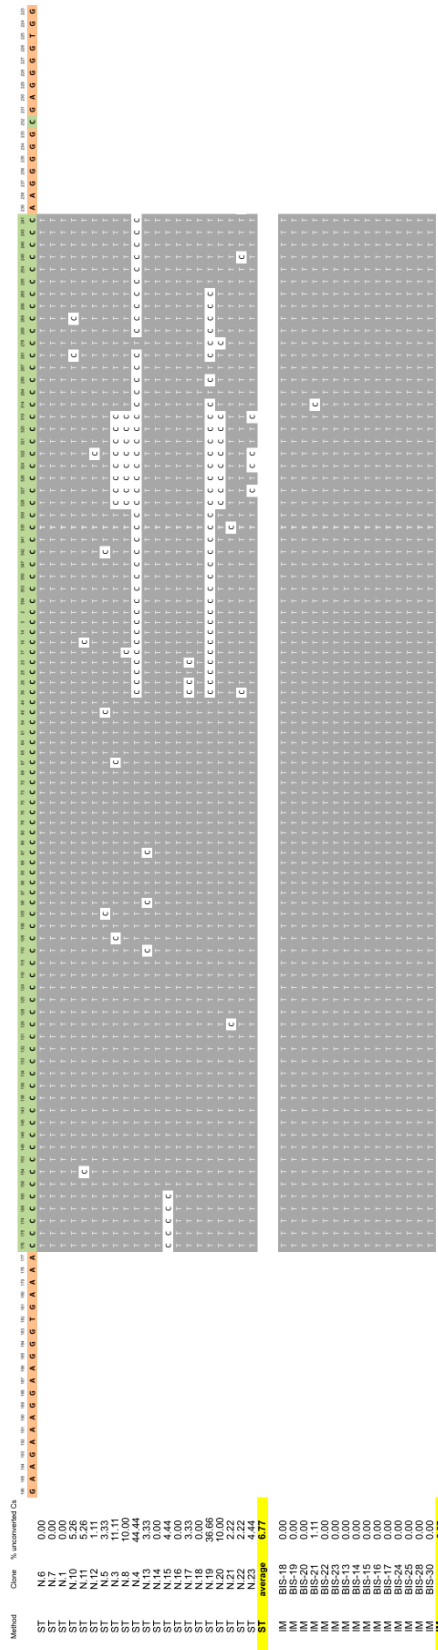

Figure S1

Figure S2

**A**

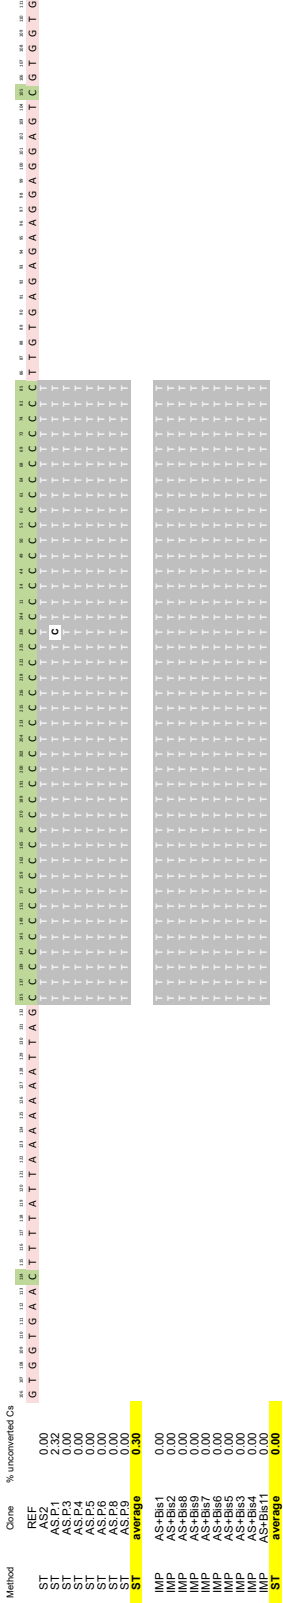

**B**

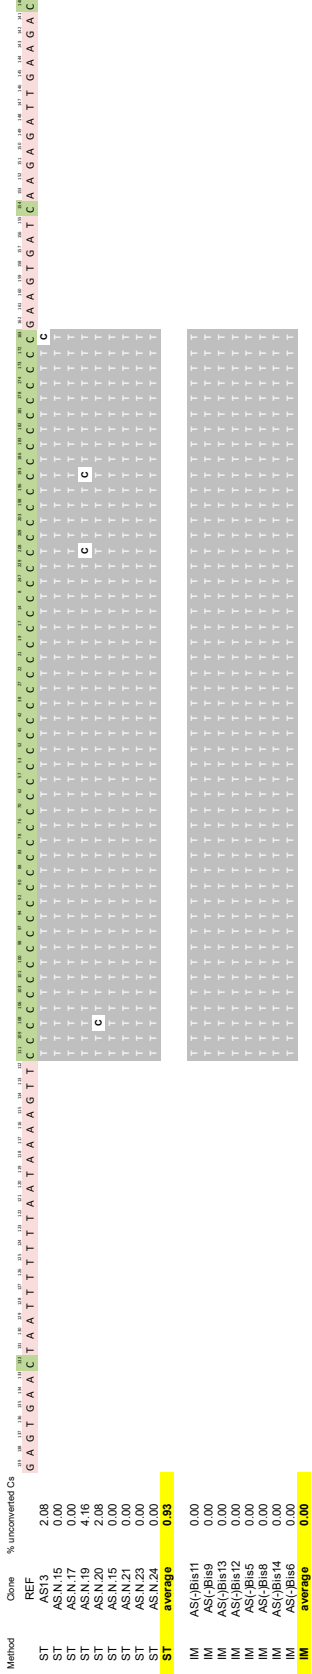

Supplement: s1 [file s1]
